# Supplementary material
Source: publisher site journal article supplement (https://www.dovepress.com/article/166893)

**Supplementary table 1 Detailed search strategy in Pubmed**

| Search                          | Query                                                                                                                                                                                                                            | Items  |
|---------------------------------|----------------------------------------------------------------------------------------------------------------------------------------------------------------------------------------------------------------------------------|--------|
| Pubmed (up to 20 December 2017) |                                                                                                                                                                                                                                  |        |
| 1                               | ("antimalarials"[Pharmacological Action] OR<br>"antimalarials"[MeSH Terms] OR "antimalarials"[All Fields])                                                                                                                       | 81666  |
| 2                               | ("hydroxychloroquine"[MeSH Terms] OR<br>"hydroxychloroquine"[All Fields])                                                                                                                                                        | 3977   |
| 3                               | ("chloroquine diphosphate"[Supplementary Concept] OR<br>"chloroquine diphosphate"[All Fields])                                                                                                                                   | 530    |
| 4                               | ("chloroquine"[MeSH Terms] OR "chloroquine"[All Fields])                                                                                                                                                                         | 22064  |
| 5                               | 1 OR 2 OR 3 OR 4                                                                                                                                                                                                                 | 86811  |
| 6                               | ("heart failure"[MeSH Terms] OR ("heart"[All Fields] AND<br>"failure"[All Fields]) OR "heart failure"[All Fields])                                                                                                               | 218047 |
| 7                               | ("death, sudden"[MeSH Terms] OR ("death"[All Fields] AND<br>"sudden"[All Fields]) OR "sudden death"[All Fields] OR<br>("sudden"[All Fields] AND "death"[All Fields]))                                                            | 54212  |
| 8                               | ("myocardial infarction"[MeSH Terms] OR ("myocardial"[All<br>Fields] AND "infarction"[All Fields]) OR "myocardial<br>infarction"[All Fields] OR ("heart"[All Fields] AND "attack"[All<br>Fields]) OR "heart attack"[All Fields]) | 233673 |
| 9                               | ("myocardial ischaemia"[All Fields] OR "myocardial<br>ischemia"[MeSH Terms] OR ("myocardial"[All Fields] AND                                                                                                                     | 448821 |

- 
- "ischemia"[All Fields]) OR "myocardial ischemia"[All Fields] OR  
"coronary artery disease"[MeSH Terms] OR ("coronary"[All  
Fields] AND "artery"[All Fields] AND "disease"[All Fields]) OR  
"coronary artery disease"[All Fields] OR ("myocardial"[All  
Fields] AND "ischemia"[All Fields]))
- 10 ("heart diseases"[MeSH Terms] OR ("heart"[All Fields] AND 1107971  
"diseases"[All Fields]) OR "heart diseases"[All Fields])
- 11 ("acute coronary syndrome"[MeSH Terms] OR ("acute"[All 26741  
Fields] AND "coronary"[All Fields] AND "syndrome"[All Fields])  
OR "acute coronary syndrome"[All Fields])
- 12 ("death, sudden, cardiac"[MeSH Terms] OR ("death"[All Fields] 30984  
AND "sudden"[All Fields] AND "cardiac"[All Fields]) OR  
"cardiac sudden death"[All Fields] OR ("sudden"[All Fields] AND  
"cardiac"[All Fields] AND "arrest"[All Fields]) OR "sudden  
cardiac arrest"[All Fields])
- 13 ("ischaemic heart disease"[All Fields] OR "myocardial 463593  
ischemia"[MeSH Terms] OR ("myocardial"[All Fields] AND  
"ischemia"[All Fields]) OR "myocardial ischemia"[All Fields] OR  
("ischemic"[All Fields] AND "heart"[All Fields] AND  
"disease"[All Fields]) OR "ischemic heart disease"[All Fields] OR  
"coronary artery disease"[MeSH Terms] OR ("coronary"[All  
Fields] AND "artery"[All Fields] AND "disease"[All Fields]) OR
-

---

|    |                                                                  |         |
|----|------------------------------------------------------------------|---------|
|    | "coronary artery disease"[All Fields] OR ("ischemic"[All Fields] |         |
|    | AND "heart"[All Fields] AND "disease"[All Fields]))              |         |
| 14 | ("coronary disease"[MeSH Terms] OR ("coronary"[All Fields]       | 297136  |
|    | AND "disease"[All Fields]) OR "coronary disease"[All Fields] OR  |         |
|    | ("coronary"[All Fields] AND "heart"[All Fields] AND              |         |
|    | "disease"[All Fields]) OR "coronary heart disease"[All Fields])  |         |
| 15 | ("angina pectoris"[MeSH Terms] OR ("angina"[All Fields] AND      | 48337   |
|    | "pectoris"[All Fields]) OR "angina pectoris"[All Fields])        |         |
| 16 | (("heart"[MeSH Terms] OR "heart"[All Fields] OR "coronary"[All   | 33749   |
|    | Fields]) AND revascularization [All Fields])                     |         |
| 17 | ("stroke"[MeSH Terms] OR "stroke"[All Fields])                   | 280971  |
| 18 | ("cardiovascular diseases"[MeSH Terms] OR                        | 2217214 |
|    | ("cardiovascular"[All Fields] AND "diseases"[All Fields]) OR     |         |
|    | "cardiovascular diseases"[All Fields])                           |         |
| 19 | 6 OR 7 OR 8 OR 9 OR 10 OR 11 OR 12 OR 13 OR 14 OR 15 OR          | 2436156 |
|    | 16 OR 17 OR 18                                                   |         |
| 20 | 5 AND 19                                                         | 5627    |

---

**Supplementary table 2 Detailed outcomes of studies on chloroquine/hydroxychloroquine and cardiovascular disease (CVD)**

| Study                                        | All CVD                                 |                              | Adjusted factors in multivariate analysis                                                                                                                                                                                                                                                                                                 | Definitions of CVD                                                                                                                                                                                                                                                                                              |
|----------------------------------------------|-----------------------------------------|------------------------------|-------------------------------------------------------------------------------------------------------------------------------------------------------------------------------------------------------------------------------------------------------------------------------------------------------------------------------------------|-----------------------------------------------------------------------------------------------------------------------------------------------------------------------------------------------------------------------------------------------------------------------------------------------------------------|
|                                              | Events occurred during follow-up period | RR (95% CI) (or OR [95% CI]) |                                                                                                                                                                                                                                                                                                                                           |                                                                                                                                                                                                                                                                                                                 |
| <b>Mok, 2007, China<sup>20</sup></b>         | 42                                      | 2.03 (0.74-5.60)             | Age, gender, smoking, hypertension, diabetes mellitus, obesity, hypercholesterolemia, chronic renal insufficiency, SLE; and use of high-dose prednisolone cyclophosphamide, azathioprine, mycophenolate mofetil, calcineurin inhibitors, aspirin, statins, angiotensin-converting enzyme inhibitors, and angiotensin II-receptor blockers | Cerebrovascular accident (CVA or stroke), transient ischemic attack, angina pectoris, acute myocardial infarction, digital gangrene, intermittent claudication, amaurosis fugax or retinal artery occlusion                                                                                                     |
| <b>Siso, 2008, Spain<sup>27</sup></b>        | 28                                      | 0.58 (0.21-1.62)             | Unadjusted                                                                                                                                                                                                                                                                                                                                | Cardiovascular events, including cerebrovascular accident or ischemic heart disease                                                                                                                                                                                                                             |
| <b>Gustafsson, 2009, Sweden<sup>18</sup></b> | 24                                      | 1.01 (0.32-2.67)             | Age                                                                                                                                                                                                                                                                                                                                       | Myocardial infarction, angina pectoris, cerebral infarction, transitory ischemic attacks, intermittent claudication or peripheral arterial thrombosis/embolus, death due to myocardial infarction, heart failure, sudden death, cerebral infarction, generalized atherosclerosis as stated by death certificate |
| <b>Nikpour, 2011, Canada<sup>21</sup></b>    | 86                                      | 0.50 (0.31-0.79)             | Age, gender, disease duration, disease-activity score, anti-phospholipid antibodies, diabetes, smoking and medications including corticosteroids,                                                                                                                                                                                         | Coronary artery disease events including angina pectoris, myocardial infarction, and sudden cardiac death                                                                                                                                                                                                       |

| Study                                                                        | All CVD                                 |                              | Adjusted factors in multivariate analysis                                                                                                                                                                                                                                                                                    | Definitions of CVD                                                                                                                                                                                                                                                        |
|------------------------------------------------------------------------------|-----------------------------------------|------------------------------|------------------------------------------------------------------------------------------------------------------------------------------------------------------------------------------------------------------------------------------------------------------------------------------------------------------------------|---------------------------------------------------------------------------------------------------------------------------------------------------------------------------------------------------------------------------------------------------------------------------|
|                                                                              | Events occurred during follow-up period | RR (95% CI) (or OR [95% CI]) |                                                                                                                                                                                                                                                                                                                              |                                                                                                                                                                                                                                                                           |
| <b>Magder, 2012, USA<sup>19</sup></b>                                        | 134                                     | 0.77 (0.54-1.12)             | immunosuppressives, antihypertensives, and lipid-lowering therapy (statins)<br>Age, gender, year before 1993, blood pressure, serum cholesterol, diabetes mellitus, SELENA-SLEDAI, anti-dsDNA, serum creatinine, low hematocrit, history of hemolytic anemia, history of lupus anticoagulant and current corticosteroid dose | Myocardial infarction, thrombotic stroke, clinically definite angina, percutaneous coronary intervention, a coronary bypass procedure, or claudication                                                                                                                    |
| <b>Arnaud, 2015, Argentina, France, Greece, Italy and Spain<sup>14</sup></b> | -                                       | 0.77 (0.32-1.84)             | Center effect                                                                                                                                                                                                                                                                                                                | Arterial thrombosis                                                                                                                                                                                                                                                       |
| <b>Sharma, 2016, USA<sup>24</sup></b>                                        | 102                                     | 0.60 (0.41-0.94)             | Age, gender, body mass index, low-density lipoprotein, smoking, diabetes, hypertension, anti-cyclic citrullinated peptide antibodies, rheumatoid factor, erythrocyte sedimentation rate, methotrexate, and tumor necrosis factor $\alpha$ inhibitor use                                                                      | A composite of Coronary artery disease (myocardial infarction, unstable angina, or cardiac revascularization procedure), sudden death due to cardiac etiology, stroke, transient ischemic attack or peripheral arterial disease with arterial revascularization procedure |
| <b>Hsu, 2017, China<sup>28</sup></b>                                         | 35                                      | 0.58 (0.29-1.15)             | Propensity score matching (age, gender, comorbidities, medications, overlapping immune diseases, number of admissions due to SLE and year of index date)                                                                                                                                                                     | Acute coronary syndrome                                                                                                                                                                                                                                                   |

| Study                                           | All CVD                                 |                              | Adjusted factors in multivariate analysis                                                                                                          | Definitions of CVD                                                                                                                                                                                                                                                                              |
|-------------------------------------------------|-----------------------------------------|------------------------------|----------------------------------------------------------------------------------------------------------------------------------------------------|-------------------------------------------------------------------------------------------------------------------------------------------------------------------------------------------------------------------------------------------------------------------------------------------------|
|                                                 | Events occurred during follow-up period | RR (95% CI) (or OR [95% CI]) |                                                                                                                                                    |                                                                                                                                                                                                                                                                                                 |
| <b>Fasano, 2017, Italy<sup>29</sup></b>         | 16                                      | 0.27 (0.08-0.86)             | ASA treatment, hypertension, aPL positivity, cumulative damage at last visit, hypercholesterolaemia                                                | Angina, myocardial infarction, heart failure, transient ischaemic attack, stroke or peripheral arterial thrombosis                                                                                                                                                                              |
| <b>Hung, 2017, China<sup>32</sup></b>           | 1253                                    | 1.06 (0.76-1.49)             | Age, sex or the preexisting cardiovascular comorbidities (hypertension, diabetes, hyperlipidemia)                                                  | Acute myocardial infarction, other acute and subacute forms of ischaemic heart disease, old myocardial infarction, angina pectoris, other forms of chronic ischemic heart disease                                                                                                               |
| <b>Roman, 2003, USA<sup>23</sup></b>            | -                                       | 0.49 (0.21-1.12)             | Age, the age at diagnosis, the duration of disease, the damage-index score, the presence of anti-Sm antibodies and significant treatment variables | Atherosclerosis (carotid plaque)                                                                                                                                                                                                                                                                |
| <b>Bessant, 2006, UK<sup>16</sup></b>           | -                                       | 0.14 (0.02-0.62)             | Unadjusted                                                                                                                                         | Myocardial infarction, angina, cerebral infarction, or peripheral vascular disease                                                                                                                                                                                                              |
| <b>de Leeuw, 2006, Netherlands<sup>17</sup></b> | -                                       | 1.05 (0.32-3.51)             | Unadjusted                                                                                                                                         | Ischemic heart disease, cerebrovascular accidents or peripheral vascular disease                                                                                                                                                                                                                |
| <b>Van-Halm, 2006, Netherlands<sup>25</sup></b> | -                                       | 0.45 (0.10-2.04)             | Age, gender, smoking, rheumatoid arthritis duration, hypertension, diabetes and hypercholesterolemia                                               | Coronary artery disease (myocardial infarction, a coronary artery by-pass graft procedure, a percutaneous transluminal coronary angioplasty or ischemic abnormalities on ECG), cerebral arterial disease (cerebral vascular accident, a transient ischemic attack or a carotid endarterectomy), |

| Study                                          | All CVD                                 |                              | Adjusted factors in multivariate analysis                                                                        | Definitions of CVD                                                                                                                                                                                                                                         |
|------------------------------------------------|-----------------------------------------|------------------------------|------------------------------------------------------------------------------------------------------------------|------------------------------------------------------------------------------------------------------------------------------------------------------------------------------------------------------------------------------------------------------------|
|                                                | Events occurred during follow-up period | RR (95% CI) (or OR [95% CI]) |                                                                                                                  |                                                                                                                                                                                                                                                            |
| <b>Becker-Merok, 2009, Norway<sup>15</sup></b> | 44                                      | 0.19 (0.08-0.47)             | Unadjusted                                                                                                       | peripheral arterial disease (aneurysm of the thoracic and/or abdominalis aorta, a peripheral arterial by-pass operation or amputation of the (lower) leg)<br>Myocardial infarction, angina pectoris, intermittent claudication or cerebrovascular accident |
| <b>Gustafsson, 2009, Sweden<sup>18</sup></b>   | 24                                      | 0.62 (0.22-1.76)             | -                                                                                                                | -                                                                                                                                                                                                                                                          |
| <b>Pons-Estel, 2009, USA<sup>22</sup></b>      | 43                                      | 1.30 (0.50-3.41)             | Unadjusted                                                                                                       | Angina, coronary artery bypass surgery, heart failure or myocardial infarction                                                                                                                                                                             |
| <b>Yang, 2012, China<sup>26</sup></b>          | -                                       | 0.067(0.01-0.73)             | Reduced levels of C4, the presence of anti-Sm antibody, proteinuria, elevated levels of AST and serum creatinine | Myocardial infarction, angina, cerebral infarction, peripheral atherosclerosis, pulmonary arterial hypertension or valvular heart disease                                                                                                                  |
| <b>Kao, 2013, USA<sup>30</sup></b>             | 17                                      | 0.49 (0.18-1.31)             | Unadjusted                                                                                                       | Myocardial infarction, percutaneous transluminal coronary angioplasty, coronary artery bypass grafting, fatal cardiac arrest, and/or cerebrovascular accident                                                                                              |
| <b>Li, 2017, China<sup>31</sup></b>            | 256                                     | 0.19(0.05-0.71)              | Age, gender, disease duration, age of RA onset,                                                                  | Acute coronary syndromes, chronic coronary heart                                                                                                                                                                                                           |

| Study | All CVD                                 |                              | Adjusted factors in multivariate analysis                                            | Definitions of CVD                                                                                                                                      |
|-------|-----------------------------------------|------------------------------|--------------------------------------------------------------------------------------|---------------------------------------------------------------------------------------------------------------------------------------------------------|
|       | Events occurred during follow-up period | RR (95% CI) (or OR [95% CI]) | hypertension, diabetes mellitus, smoking, hyperlipidemia, rheumatoid nodules, anemia | disease, ischemic and hemorrhagic stroke, peripheral arterial reconstructive surgery, limb amputation, or an ankle brachial pressure index (ABPI) <0.50 |

Abbreviations: aPL, antiphospholipid antibodies; AST, aspartate transaminase; CI, confidence interval; C4, complement component 4; CVD, cardiovascular disease; OR, odds ratio; RA, rheumatoid arthritis; RR, relative risk; SELENA, safety of estrogens in lupus erythematosus national assessment; SLE, systemic lupus erythematosus; SLEDAI, systemic lupus erythematosus disease activity index instrument score.



**Supplementary figure 1. Sensitivity analysis excluding unadjusted RR in HR/RR-reporting studies.**

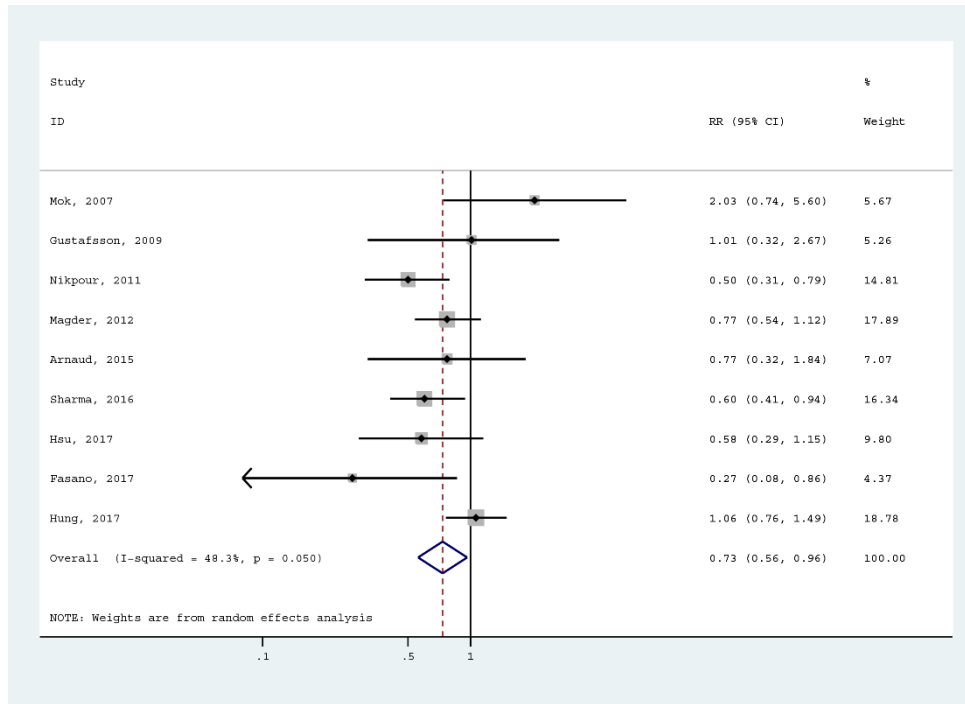

**Supplementary figure 2. Sensitivity analysis excluding unadjusted OR in OR-reporting studies.**

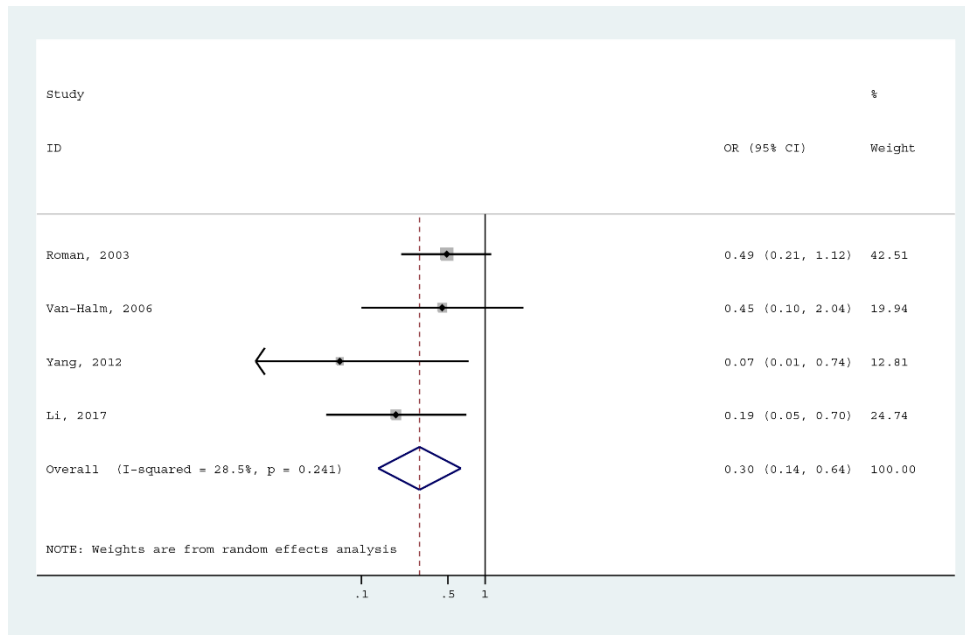

**Supplementary figure 3. Sensitivity analysis using quality-effects model in HR/RR-reporting studies.**

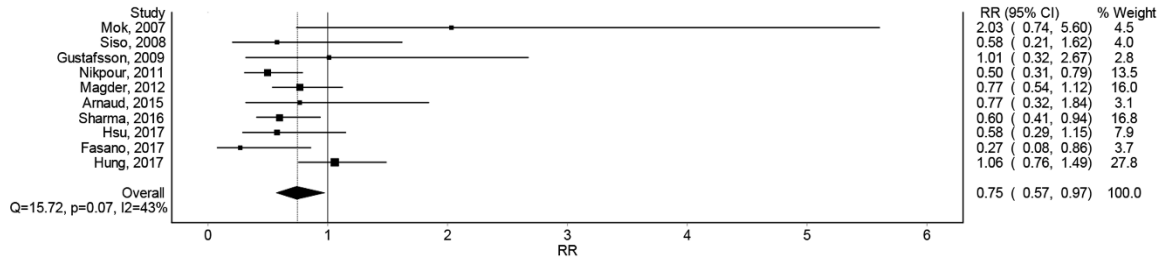

**Supplementary figure 4. Sensitivity analysis using quality-effects model in OR-reporting studies.**

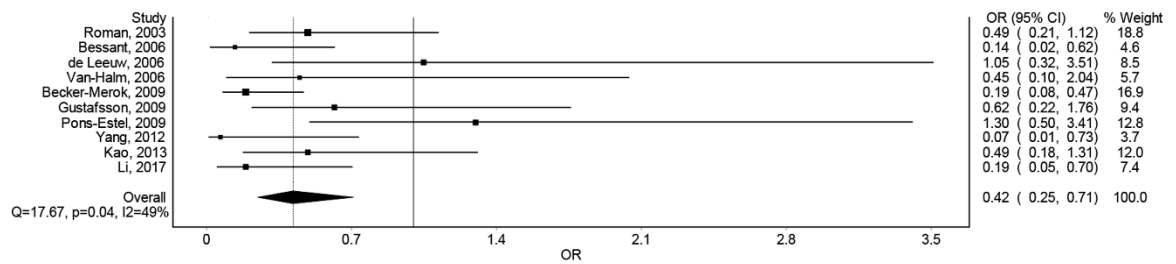

**Supplementary figure 5. Funnel graph in HR/RR-reporting studies.**

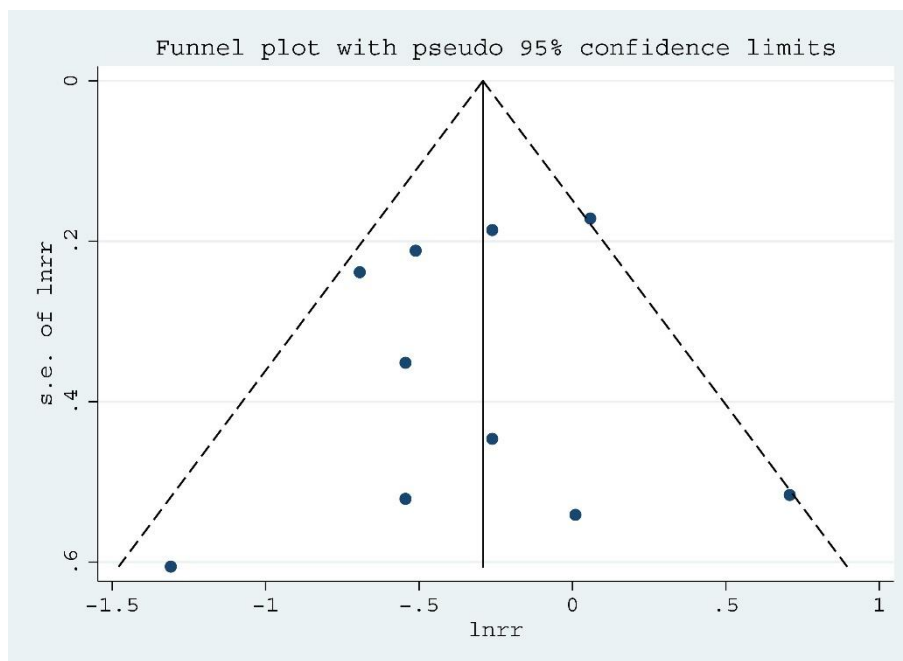

**Supplementary figure 6. Funnel graph in OR-reporting studies.**

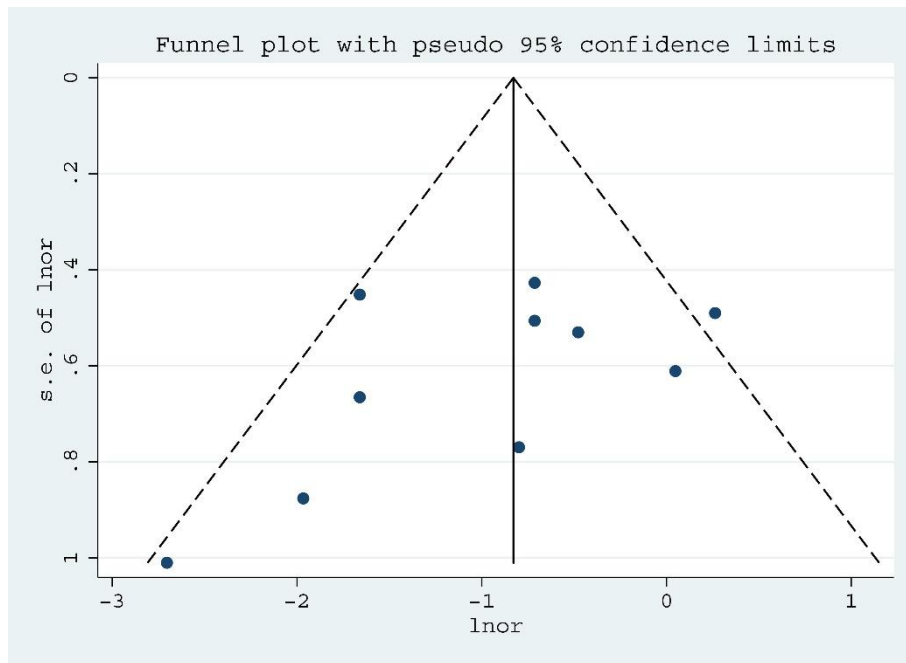

Supplement: Supplementary file 1 [file get_supplementary_file.php]
